# Supplementary material for: Elevated ITGA5 facilitates hyperactivated mTORC1-mediated progression of laryngeal squamous cell carcinoma via upregulation of EFNB2
Source: Theranostics. 2022 Oct 24;12(17):7431–49. doi: 10.7150/thno.76232 (PMC9691358; doi:10.7150/thno.76232)
Supplement: Supplementary file 1 — Supplementary materials and methods, figures, and tables 1-8. [file thnov12p7431s1.pdf]

# **Elevated ITGA5 facilitates hyperactivated mTORC1-mediated progression of laryngeal squamous cell carcinoma via upregulation of EFNB2**

## **MATERIALS AND METHODS**

### **Tumor specimens**

A total of 94 LSCC and adjacent normal mucosal (ANM) tissues were acquired during routine surgeries at the First Affiliated Hospital of Anhui Medical University (Anhui, China) from 2014 to 2020. None of the patients were subjected to chemotherapy, radiotherapy, or other related antitumor therapies before surgery. The TNM staging was done referring to the American Joint Committee on Cancer (AJCC) 8th edition TNM Staging Criteria. The study was conducted in accordance with Declaration of Helsinki, and the ethical approval was obtained from the First Affiliated Hospital of Anhui Medical University Research Ethics Committee. All of the patients provided a written informed consent before participation. Detailed information of all the 94 LSCC patients is listed in Table S1-4.

### **Establishment and characterization of a novel LSCC cell line, LIU-LSC-1**

Fresh tumor tissue was isolated from a 74-year-old LSCC patient (T3N1M0) who underwent surgery, and the specimen was immediately immersed in RPMI 1640 medium (Gibco, NY, USA) containing penicillin (100 U/mL)/streptomycin (0.1 mg/mL) and amphotericin B (0.25 µg/mL) (Beyotime, Jiangsu, China). The tissue sample was washed three times in phosphate-buffered saline (PBS) and cut into small pieces. Then, small tumor masses were dissociated enzymatically in RPMI 1640

medium containing 200 U/mL type IV collagenase (Sigma, Saint Louis, MO, USA) at 37 °C for 12 h. After two rounds of washing in PBS and centrifugation, the sediments were seeded onto 60 mm Petri dishes and cultured in Epithelial Cell Complete Medium (VivaCell, Shanghai, China) with 1% penicillin/streptomycin (Beyotime). After 3 days of incubation, the cell culture medium was replaced. Cells were passaged every 3 to 4 days. Cancer-associated fibroblasts (CAFs) were removed by a brief exposure to trypsin digestion (0.25% trypsin-EDTA, Beyotime). Cells were named LIU-LSC-1 and compared with the short-tandem repeat (STR) data of cell lines included in ATCC, DSMZ, JCRB and RIKEN databases. No closely matched cell lines were found (Table S5, EV < 0.8), which suggested that LIU-LSC-1 may be a new cell line. Mycoplasma analysis of this cell line was negative.

For Giemsa staining, followed by fixation with methanol for 10 min, LIU-LSC-1 cells were stained with crystal violet for 10 min and photographed under microscope. Ultrastructural analysis of cells was performed by transmission electron microscopy (TEM). In brief, LIU-LSC-1 cells were fixed with 2.5% glutaraldehyde at 4 °C for 2.5 h, and then the cells were washed three times with PBS and post-fixed in 1% OsO<sub>4</sub> for 2 h at 4 °C. After being dehydrated through an ethanol gradient, the samples were embedded in Spurr's resin. Then ultrathin sections were cut and stained with either uranyl acetate or lead citrate. The samples were observed under a JEOL JEM1400 TEM. Tonofilaments in the cytoplasm, desmosomes in the intercellular connections, intranuclear inclusions and indented nuclear membrane are supposed to the characteristics of tumor cells [1].

For flow cytometry, LIU-LSC-1 cells at the logarithmic growth phase were stained with CD44 (5  $\mu$ g/mL) or the isotype control antibodies (5  $\mu$ g/mL) for 30 min at room temperature in the dark. After washed three times by centrifugation-resuspension with ice-cold PBS, the cells were stained with a secondary antibody (Goat Anti-Mouse IgG H&L, DyLight® 488) and incubated for 30 min. Subsequently, the cells were analyzed by flow cytometer (Becton Dickinson, San Diego, CA, USA).

## **Cell culture**

Cell source and culture conditions of murine embryonic fibroblasts (MEFs) ( $Tsc1^{+/+}$ ,  $Tsc1^{-/-}$ ,  $Tsc2^{+/+}$ , and  $Tsc2^{-/-}$ ), HEK293T cells and LSCC cell lines (AMC-HN-8, TU177, and LIU-LSC-1) are listed in Table S6. MEFs ( $Tsc1^{+/+}$ ,  $Tsc1^{-/-}$ ,  $Tsc2^{+/+}$ , and  $Tsc2^{-/-}$ ) have been described previously [2, 3]. For hypoxic exposure, cells were cultured under hypoxic (1% O<sub>2</sub>) or normoxic (21% O<sub>2</sub>) conditions for the indicated times. All cell lines were verified by STR analysis and tested for mycoplasma contamination by MycoAlert Mycoplasma Detection Kit (Lonza #LT07-118).

## **Antibodies, reagents and plasmids**

All information regarding antibodies used in this study is provided in Table 7. Rapamycin (Rapa), everolimus (RAD001), deferoxamine (DFX), DAPT and MHY1485 were purchased from Selleck Chemicals (Houston, TX, USA). Jagged1-Fc was obtained from R&D system (Minneapolis, MN, USA). Lipofectamine RNAiMax

was obtained from Invitrogen (Carlsbad, CA, USA). pRL-TK, pGL3-Basic, pcDNA3.0, pcDNA3.0-HA-HIF-1 $\alpha$ , lenti-CRISPRv2 plasmids and packaging vectors (pVSVG and psPAX2) were purchased from Addgene (Cambridge, MA, USA).

### **RNA interference, lentivirus infection and CRISPR-Cas9**

LIU-LSC-1 cells were seeded into 12-well plates and transfected with small interfering RNAs (siRNAs) using Lipofectamine RNAiMax (GenePharma, Shanghai, China). The sequences used are as follows: mTOR 5'-CCCUGCCUUUGUCAUGCCUTT-3'; Rictor, 5'-ACUUGUGAAGAAUCGUAUCTT-3'; Raptor, 5'-GGACAACGGCCACAAGUACTT-3'; Negative control (NC), 5'-UUCUCCGAACGUGUCACGUTT-3'.

LIU-LSC-1 cells were stably infected with short hairpin RNAs (shRNAs) targeting HIF-1 $\alpha$ , Raptor, ITGA5 and EFNB2 using lentivirus vector GV248 (GenePharma). The target sequences used are as follows: shRaptor-1, 5'-GGACAACGGCCACAAGTAC-3'; shRaptor-2, 5'-CCCTCATCGGAGTTTCCTT-3'; shHIF-1 $\alpha$ -1, 5'-GCCGCTCAATTTATGAATA-3'; shHIF-1 $\alpha$ -2, 5'-GCTGGAGACACAATCATAT-3'; shITGA5, 5'-GCTACCTCTCCACAGATAACT-3'; shEFNB2-1, 5'-GCAGAACTGCGATTTCCAAAT-3'; shEFNB2-2, 5'-GGAATTCCTCGAACTCCAAAT-3'; the control scrambled shRNA (shSc), 5'-TTCTCCGAACGTGTCACGT-3'. The recombinant vectors were co-transfected with packaging vectors (psPAX2 and pVSVG) into HEK293T cells. After 48 h, the viral

supernatants were filtered and used to infect LIU-LSC-1 cells. ITGA5 and EFNB2 overexpressing cell lines were generated by lentivirus vector GV492 containing the full-length cDNA sequence of human ITGA5 and EFNB2, respectively (GenePharma).

The following single-guide RNAs (sgRNAs) targeting ITGA5 and TSC2 were designed by Open-access software program CRISPR and synthesized by Sangon Biotech Co., Ltd. (Shanghai, China): ITGA5-sgRNA#1, 5'-GGGGCAACAGTTCGAGCCCA-3'; ITGA5-sgRNA#2, 5'-GGAGCCACTGAGCGACCCCG-3'; TSC2-sgRNA, 5'-CACCGAACAATCGCATCCGGATGAT-3'. Oligos were then cloned into the Cas9 backbone Lenti-CRISPRv2 vector. Recombinant plasmids, psPAX2 and pVSVG were co-transfected into HEK293T cells. The medium was harvested and filtered to remove cell debris 48 h later. After infection, the cells were obtained by culture over 14 days in 1.5 µg/mL puromycin (Sigma, MO, USA). Then cells were placed in 96-well plates and examined by microscopy the next day to be sure that only one cell was seeded per well. Clones were passaged after 10 days and monoclonal lines were screened via western blotting for ITGA5 knockout.

#### **Total RNA isolation, quantitative real-time PCR (qRT-PCR) assay and RNA sequencing**

Total RNA extraction, cDNA synthesis, qRT-PCR and RNA sequencing were performed as described previously [4]. The primers for qRT-PCR (provided by

Sangon Biotech Co., Ltd.) are shown in Table S8. The RNA samples were sequenced on Illumina Novaseq™ 6000 (LC Sciences, Hangzhou, China).

### **Western blot analysis**

The total protein of cells was harvested using RIPA lysate (Beyotime). The lysates were separated by NuPAGE 4-12% Bis-Tris and transferred to polyvinylidene fluoride membrane (Millipore, Billerica, MA, USA). Then the membrane was blocked with 5% nonfat milk for 1 h and incubated with the primary antibodies (diluted 1:1000) at 4 °C overnight. Final detection was performed using chemiluminescence after the secondary antibody incubation.

### **Chromatin immunoprecipitation (ChIP)**

The ChIP assay was performed as previously described using a SimpleChIP® Plus Enzymatic Chromatin IP Kit (Cell Signaling Technology, MA, USA) [5]. PCR primer sequences for the putative HIF-1 $\alpha$ -binding region (PBR) and a nonspecific HIF-1 $\alpha$ -binding region (NBR) of human ITGA5 were as follows: Site1, forward, 5'-CCACCCCTAATCTCCCAAATCCT-3'; reverse, 5'-TCAGGATCTTTAAGCCCAGCATTG-3'; Site2, forward, 5'-CCAAACCCGCCAGTCTAACC-3'; reverse, 5'-GGGGGGGCATTCCTGGGT-3'; NBR, forward, 5'-CAAAGCCAGCACCAGTGAAGAGAC-3'; reverse, 5'-CCCTCCTCCCAACACACATATATAC-3'. The primer sequences for qRT-PCR were as follows: NBR, forward, 5'-AAGCCAGCACCAGTGAAGAGAC-3'; reverse, 5'-ACTCCTGGTTCTAGCTACTTTAATCAC-3'. PBR, forward,

129 5'-CGCCCAGTCTAACCCAGTCCA-3'; reverse,  
130 5'-CCTGGGTCCCTGGAAGTCTGAG-3'.

### 131 **Reporter constructs and luciferase reporter assay**

132 A 334-bp fragment of the human ITGA5 promoter (-266/+67) containing the  
133 intact HIF-1 $\alpha$ -binding site was obtained by PCR using human genomic DNA. The  
134 primer sequences were as follows: forward,  
135 5'-GGGGTACCTGGAAAGGAATGGGGAGGAAGGAG-3'; reverse,  
136 5'-GAAGATCTGCGCCCGCTCTTCCCTGTCC-3'. The fragment was cloned into the  
137 *Bgl* II and *Kpn* I sites of the pGL3-Basic plasmid (ITGA5-Luc). A Q5<sup>®</sup> Site-Directed  
138 Mutagenesis Kit (NEB, Ipswich, MA, USA) was used to mutate the potential  
139 HIF-1 $\alpha$ -binding site (ITGA5-mut). The primer sequences were as follows: forward,  
140 5'-CCCCTAAGGGAAATGGGGGGGGGGCGC-3'; reverse,  
141 5'-TGGGGGACGCGGGCTCAG -3'. The 293T cells were then seeded into 24-well  
142 culture plates and transfected with 400 ng of ITGA5-Luc or ITGA5-mut together with  
143 20 ng of an internal control plasmid pRL-TK and 400 ng of HA-HIF-1 $\alpha$ -pcDNA3.0 or  
144 the empty vector pcDNA3.0. The luciferase activity was estimated using the  
145 Dual-Luciferase Reporter Assay System (Promega, USA).

### 146 ***In vitro* functional assays**

147 Cell Counting Kit-8 (CCK-8, TargetMol, Shanghai, China), colony formation,  
148 wound healing and transwell assays were used to test the *in vitro* functional roles of  
149 ITGA5 and EFNB2. For CCK-8 assay, cells were seeded onto 96-well plates with

indicated treatment at 1000 cells/well. 10  $\mu$ L of CCK-8 reagent was added to each well at the specified time point. After incubation for 2 h, the reaction product was measured at 450 nm using a microplate reader. For colony formation assays, 1500 of treated cells were seeded into 60 mm plates. 10 days later, cells were fixed with 4% paraformaldehyde and stained with crystal violet. Colonies containing more than 50 cells were counted. For wound healing assay, in order to create a narrow wound-like gap, the monolayer of cells was scratched with a 200- $\mu$ L pipette tip. Cell migration into the wound area was recorded for each condition after 18 h or 24 h. For transwell assays, 24-well transwell chambers (Corning, NY, USA) were used.  $2 \times 10^4$  cells in 200  $\mu$ L of DMEM (or RPMI 1640) with 1% FBS were seeded in the upper chamber and the lower chamber contained 500  $\mu$ L medium with 10% FBS. The chambers were incubated at 37 °C with 5% CO<sub>2</sub> for 24 h (migration assay, without matrigel; invasion assay, coated with 250  $\mu$ g/mL matrigel coating). Then, cells on the upper surface of the filter were removed and the cells on the lower membrane surface were stained with crystal violet after fixation with 4% paraformaldehyde. Cell migration and invasion were quantified by counting 10 random fields under a microscope (200 $\times$ ).

#### **Chicken chorioallantoic membrane (CAM) assay**

Pathogen-free fertilized chicken eggs were purchased from Jinan SAIS Poultry Company (Shangdong, China). The CAM assay was performed as described previously [6]. Briefly, On embryonic developmental day 8 (EDD 8), a window about 1.0 cm was opened in the shell of each egg, and sterile gelatin sponge mixed with 20  $\mu$ L of cell suspension containing  $2 \times 10^6$  LSCC cells was planted on CAM. The CAM

was separated from the eggs after fixation with stationary solution (methanol: acetone, 1:1) for 30 min on EDD 15. Then, the CAM was recorded by a digital camera, and the number of blood vessels that converged toward the implant were counted by three blind observers.

### **Animal experiments, cell derived xenograft (CDX) models and patient-derived xenograft (PDX) models**

All animal studies were performed under approval of the Experimental Animal Ethical Committee of Anhui Medical University. Male BALB/c nude mice and NOD/SCID mice (4-week-old) were purchased from GemPharmatech Co., Ltd (Nanjing, China). For tumorigenicity assays,  $5 \times 10^6$  genetically engineered LSCC cells were subcutaneously injected into the right armpits of each mice (five per group), respectively. The tumor volume was measured and calculated by the formula  $V = 0.5 \times W^2 \times L$  (V, volume; L, length; W, width).

For tumor metastasis experiments,  $1 \times 10^6$  genetically engineered LSCC cells suspended in 100  $\mu$ L PBS were injected into nude mice via the tail vein. Mice were killed and metastatic lung tumors were analyzed under dissecting microscope after hematoxylin and eosin (H&E) staining at 8 weeks after tail vein injection.

For intratumoral siRNAs injections, the chemically modified siRNAs were provided by GenePharma. The target sequences are listed as follows: siNC, 5'-UUCUCCGAACGUGUCACGUTT-3'; siITGA5-1, 5'-UACCUCUCCACAGAUAACUTT-3'. Entranster<sup>TM</sup>-*in vivo* transfection reagents were provided by Engreen Biosystem Co., Ltd (Beijing, China).

For CDX models, 200  $\mu$ L serum-free RPMI 1640 containing  $5 \times 10^6$  LIU-LSC-1 cells were subcutaneously injected into the right flank of each mouse. After tumors were detectable, 20 tumor-bearing mice were randomly assigned into four groups (five per group) and were treated with CDDP (3 mg/kg, twice/week), normal saline (NS, twice/week), together with ITGA5 siRNAs (100  $\mu$ g, twice/week) or non-targeting control siRNAs (100  $\mu$ g, twice/week). siRNA was injected directly into the tumor bodies at two or more spots each time. NS and CDDP were injected into the abdominal cavity. The mice were sacrificed after 3 weeks of treatment, and then tumors were dissected and weighed. Furthermore, tissues were embedded in paraffin for H&E or IHC.

For PDX models, freshly excised tumor tissues were obtained from a LSCC patient receiving surgery at the First Affiliated Hospital of Anhui Medical University. The tissues were cut into  $2 \times 2 \times 3$ -mm<sup>3</sup> pieces (kept in PRMI 1640 supplemented with penicillin and streptomycin) and grafted subcutaneously into the flank of NOD/SCID mice as P1. PDX tumors were harvested and transplanted into BALB/c nude mice as P2 when the tumor size upon reached a size of 1000 mm<sup>3</sup>. We followed the aforementioned protocols to transplant PDX tumor tissues into next-generation mice as P3 and performed next step according to the protocol of CDX models.

#### **Immunohistochemical staining (IHC) and immunofluorescence (IF) assay**

IHC analysis staining was performed as previously described [5]. Antibodies against ITGA5 (diluted 1:50), EFNB2 (diluted 1:200), p-S6 (diluted 1:75), Ki-67 (diluted 1:100) and CD31 (diluted 1:100) were used. A modified histologic score

(H-scores, [ $\{\% \text{ of weak staining}\} \times 1\} + [\{\% \text{ of moderate staining}\} \times 2] + [\{\% \text{ of strong staining}\} \times 3]$ ) was used to evaluate IHC staining [7, 8]. Each staining obtained an H-score between 0 and 300, and the average of H-score for all the cases was calculated.

For IF assays, Cells were treated with DMSO, Rapa (20 nM), RAD001 (50 nM) or MHY1485 (10  $\mu$ M) for 24 h and then stained as previously described [5]. Primary antibodies against ITGA5 (diluted 1:50), EFNB2 (diluted 1:200), or CD44 (diluted 1:1000) and FITC-conjugated secondary antibody (diluted 1:1000) were used. DAPI (Beyotime) was used to stain nuclei. The images were captured by LSM880 + Airyscan confocal laser scanning microscope (Carl Zeiss, Oberkochen, Germany).

## **Bioinformatics analysis and Statistical analysis**

RNA sequencing data and clinical information of LSCC were obtained from the Gene Expression Omnibus (GEO) dataset (<http://www.ncbi.nlm.nih.gov/geo/>) and The Cancer Genome Atlas (TCGA) (<http://cancergenome.nih.gov/>). The receiver operating characteristic (ROC) curves were used to evaluate the sensitivity and specificity of genes as diagnostic biomarkers.

All statistical analyses were performed using GraphPad Prism 6.0. Differences between two experimental groups were conducted using the two-tailed Student's t-test. Correlations between genes were analyzed by Pearson's correlation analysis. The survival rates were calculated by the Kaplan-Meier method.  $P < 0.05$  was considered statistically significant (\* $P < 0.05$ , \*\* $P < 0.01$  and \*\*\* $P < 0.001$ ).

## References

1. Wu CP, Zhou L, Gong HL, Du HD, Tian J, Sun S, et al. Establishment and characterization of a novel HPV-negative laryngeal squamous cell carcinoma cell line, FD-LSC-1, with missense and nonsense mutations of TP53 in the DNA-binding domain. *Cancer letters*. 2014; 342: 92-103.
2. Zhang H, Bajraszewski N, Wu E, Wang H, Moseman AP, Dabora SL, et al. PDGFRs are critical for PI3K/Akt activation and negatively regulated by mTOR. *The Journal of clinical investigation*. 2007; 117: 730-8.
3. Zha X, Wang F, Wang Y, He S, Jing Y, Wu X, et al. Lactate dehydrogenase B is critical for hyperactive mTOR-mediated tumorigenesis. *Cancer research*. 2011; 71: 13-8.
4. Wang YN, Xu YF, Liang YX, Fan XY, Zha XJ. Transcriptomic Sequencing of Airway Epithelial Cell NCI-H292 Induced by Synthetic Cationic Polypeptides. *BioMed research international*. 2019; 2019: 3638469.
5. Wan X, Zhou M, Huang F, Zhao N, Chen X, Wu Y, et al. AKT1-CREB stimulation of PDGFR $\alpha$  expression is pivotal for PTEN deficient tumor development. *Cell Death Dis*. 2021; 12: 172.
6. Chen X, Miao M, Zhou M, Chen J, Li D, Zhang L, et al. Poly-L-arginine promotes asthma angiogenesis through induction of FGFBP1 in airway epithelial cells via activation of the mTORC1-STAT3 pathway. *Cell Death Dis*. 2021; 12: 761.
7. Detre S, Saclani Jotti G, Dowsett M. A "quickscore" method for immunohistochemical semiquantitation: validation for oestrogen receptor in breast carcinomas. *J Clin Pathol*. 1995; 48: 876-8.
8. Paschalis A, Sheehan B, Riisnaes R, Rodrigues DN, Gurel B, Bertan C, et al. Prostate-specific Membrane Antigen Heterogeneity and DNA Repair Defects in Prostate Cancer. *Eur Urol*. 2019; 76: 469-78.

## SUPPLEMENTARY FIGURES

**Figure S1**

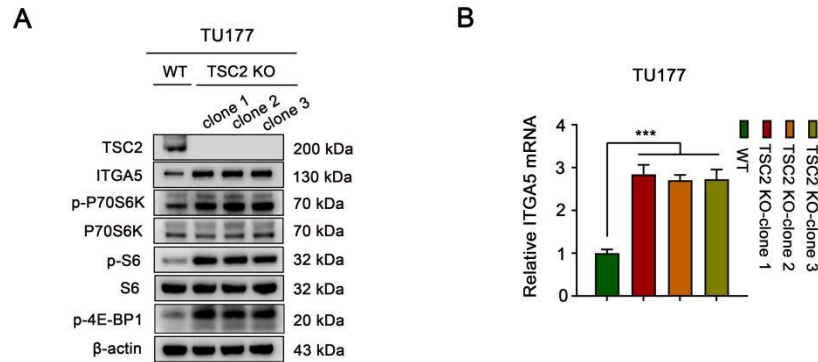

**Figure S1. Knockout of TSC2 led to the activation of mTORC1 and the upregulation of ITGA5 in the TU177 cells. (A-B)** TSC2 knockout TU177 cell lines were constructed using a CRISPR/Cas9 approach and three different clones were screened out. Cell lysates of the indicated cells were subjected to western blotting with the indicated antibodies **(A)**. ITGA5 mRNA levels in the indicated cells were detected using qRT-PCR **(B)**. The error bars represent the mean  $\pm$  SD of triplicate technical replicates. \*\*\*P < 0.001.

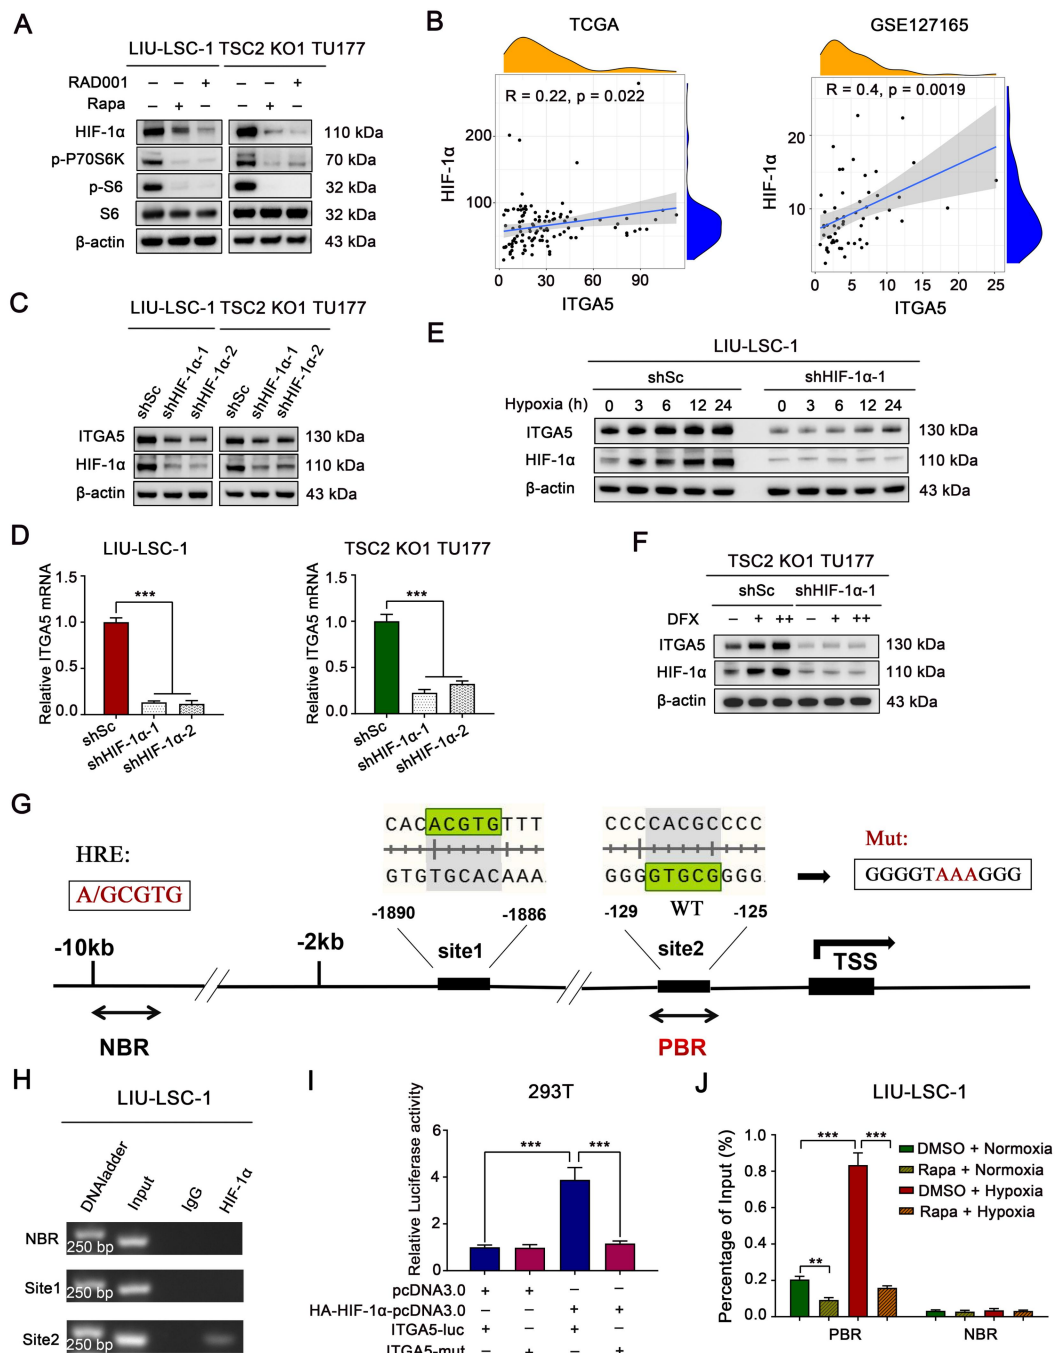

**Figure S2. mTORC1 enhances ITGA5 expression through upregulation of HIF-1α.** (A) LIU-LSC-1 and TSC2 KO1 TU177 cells were treated with 20 nM Rapa or 50 nM RAD001 for 24 h, and cell lysates were subjected to western blot analysis. (B) The correlation between HIF-1α and ITGA5 expression was analyzed by

274 Pearson's correlation analysis using the TCGA and GSE127165 cohorts. **(C-D)**  
275 LIU-LSC-1 and TSC2 KO1 TU177 cells were transfected with shRNAs targeting  
276 HIF-1 $\alpha$  (shHIF-1 $\alpha$ ) or control shRNA- (shSc). Immunoblotting **(C)** and qRT-PCR **(D)**  
277 were performed to detect the expression of ITGA5. **(E-F)** LIU-LSC-1-shHIF-1 $\alpha$  and  
278 LIU-LSC-1-shSc cells were treated with 1% O<sub>2</sub> for the indicated times **(E)**;  
279 HIF-1 $\alpha$ -knockdown TSC2 KO1 TU177 cells and the control cells were treated with  
280 DFX (+ indicates 100  $\mu$ M; ++ indicates 200  $\mu$ M) for 24 h **(F)**. Cell lysates were  
281 subjected to western blot analysis **(E-F)**. **(G)** Schematic representation of the putative  
282 HIF-1-binding site of the human *ITGA5* gene. **(H)** LIU-LSC-1 cells were subjected to  
283 ChIP assay using an anti-HIF-1 $\alpha$  antibody. Normal rabbit IgG antibody was used as a  
284 negative control. PCR amplifications were performed using primers surrounding the  
285 putative HIF-1 $\alpha$  binding site of the human *ITGA5* gene. **(I)** The ITGA5-Luc or  
286 ITGA5-mut constructs together with HA-HIF-1 $\alpha$ -pcDNA3.0 or pcDNA3.0 were  
287 co-transfected into the 293T cells with pRL-TK plasmid for 24 h, and then luciferase  
288 activity was estimated. **(J)** LIU-LSC-1 cells were treated with DMSO or 20 nM Rapa  
289 under normoxia or hypoxia condition for 24 h. HIF-1 $\alpha$  antibody-immunoprecipitated  
290 DNA from these cells was amplified and quantified by qRT-PCR for NBR and PBR  
291 regions. The data were plotted as the ratio of immunoprecipitated DNA subtracting  
292 nonspecific binding to IgG vs. total input DNA (%). The error bars represent the mean  
293  $\pm$  SD of triplicate technical replicates. \*\*\*P < 0.001.

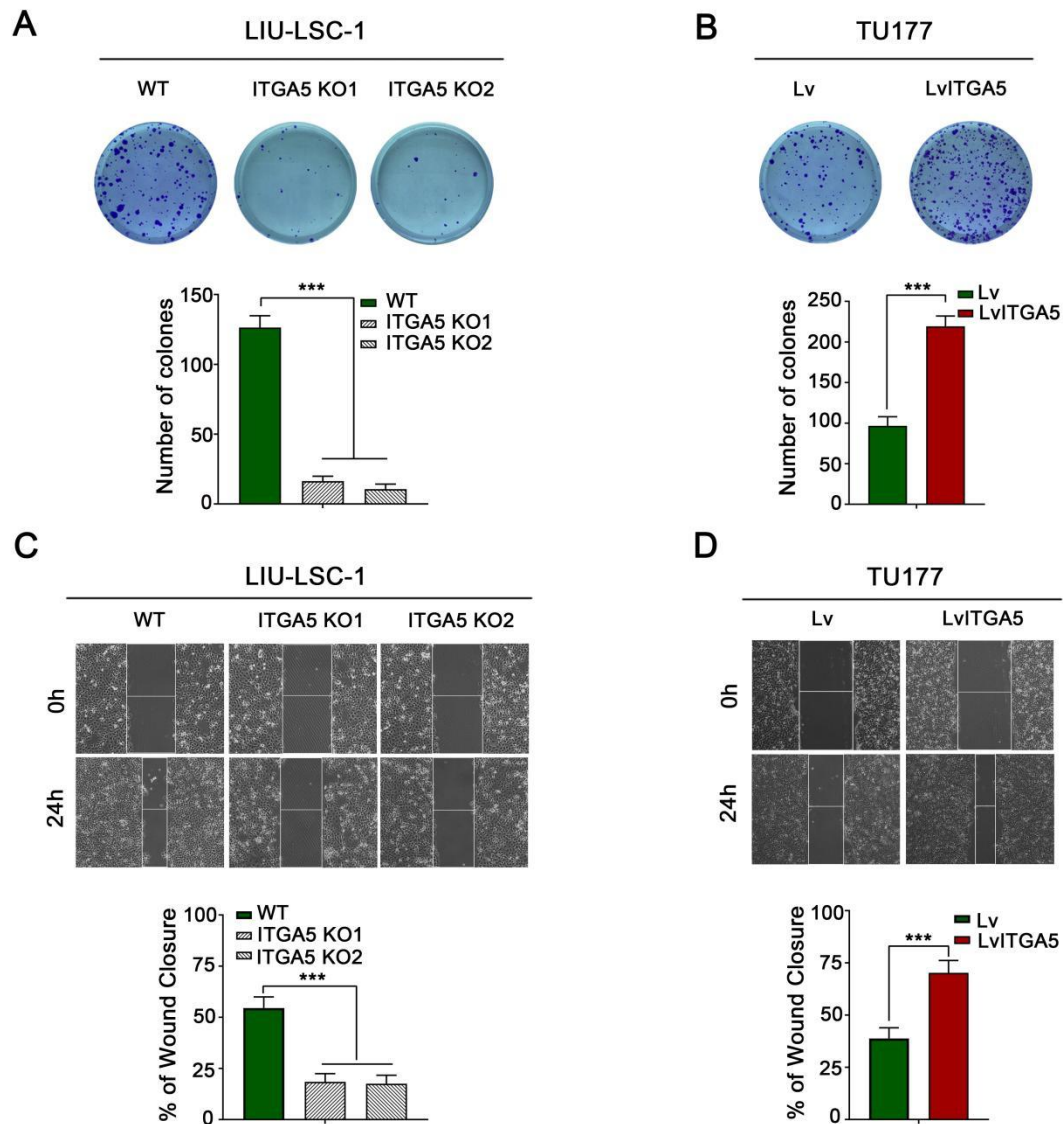

295 **Figure S3. ITGA5 promotes proliferation and migration of LSCC cells. (A, C)**  
 296 **ITGA5 WT and KO LIU-LSC-1 cells. (B, D) ITGA5-overexpressing TU177 cells and**  
 297 **the control cells. Proliferative and migratory abilities of the indicated cells were**  
 298 **measured by colony formation (A-B) and wound healing assays (C-D), respectively.**  
 299 **The error bars represent the mean  $\pm$  SD of triplicate independent experiments. \*\*\*P <**  
 300 **0.001.**

301 **Figure S4**

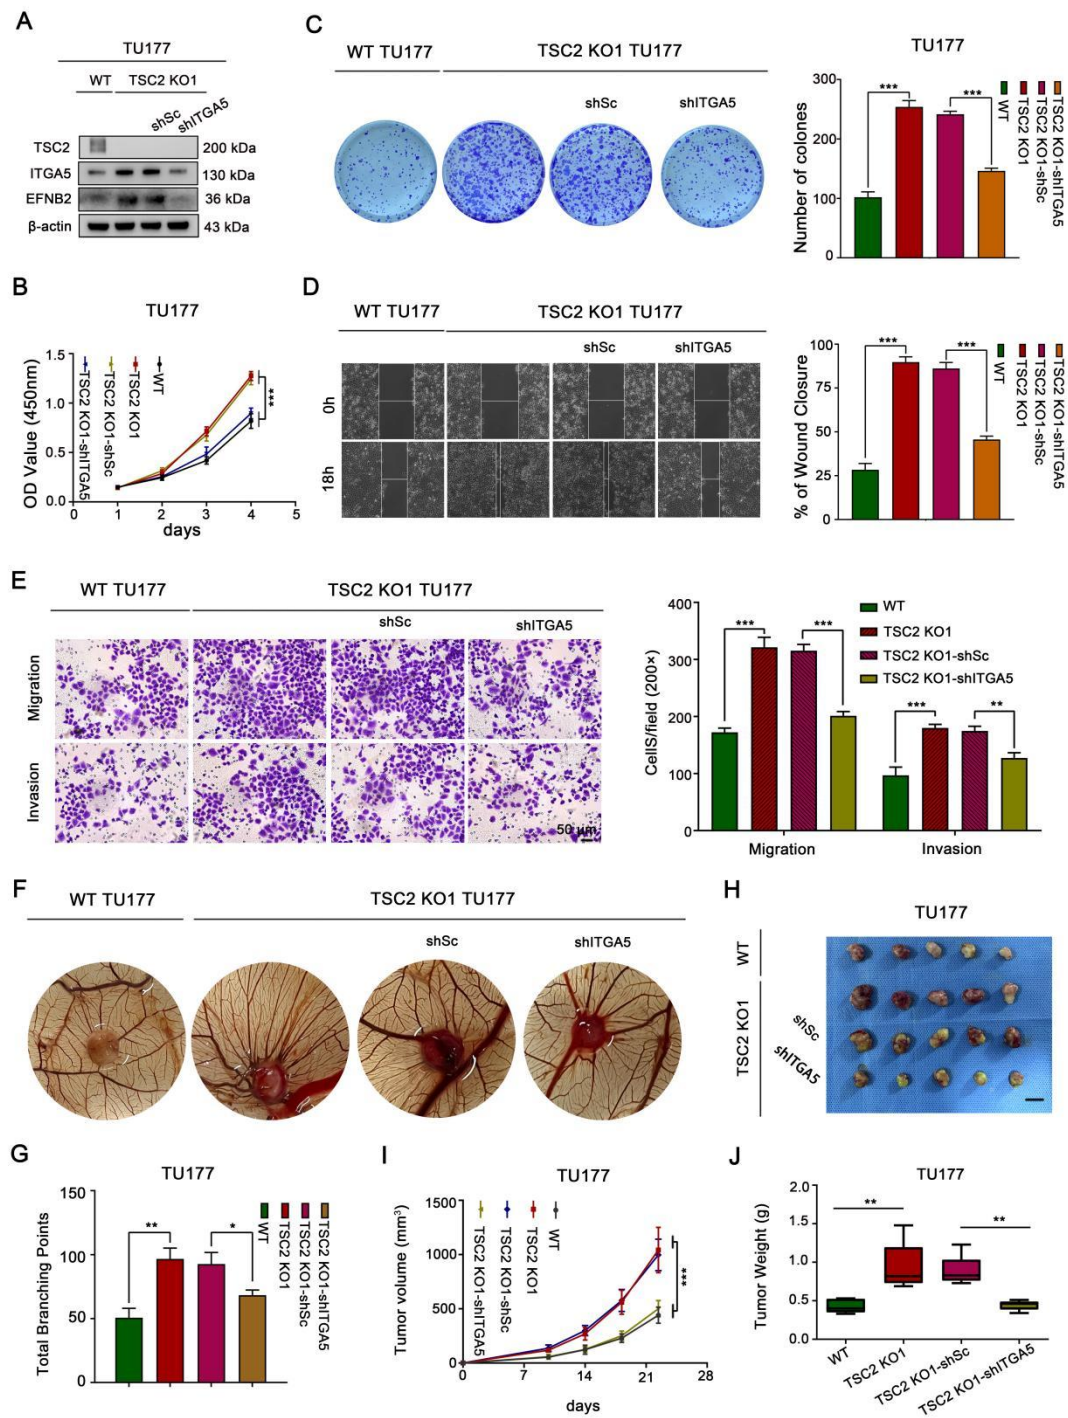

302 **Figure S4. Depletion of ITGA5 reduced the tumor-promoting effect of TSC2**  
 303 **knockout on the TU177 cells. (A-J)** TSC2 KO1 TU177 cells were infected with  
 304 ITGA5 shRNAs-expressing (shITGA5) lentiviruses or shSc. Cell lysates of the  
 305 indicated cells were subjected to western blotting (A). Cell growth rates, migration

306 and invasion abilities of the indicated cells were evaluated by CCK-8 assays **(B)**,  
307 colony formation assays **(C)**, wound healing assays **(D)** and transwell assays **(E)**,  
308 **(C-E, left panel: representative images; right panel: statistical analysis)**. Scale bars,  
309 50  $\mu$ m. Data were indicated as mean  $\pm$  SD of triplicate technical replicates. \*\*P < 0.01,  
310 \*\*\*P < 0.001. The indicated cells were subjected to CAM assays **(F-G)**,  
311 representative images **(F)** and statistical analysis **(G)** are shown. The error bars  
312 represent mean  $\pm$  SD (n = 6 per group). \*P < 0.05; \*\*P < 0.01. **(H-J)** The indicated  
313 cells were subcutaneously injected into mice for monitoring tumor growth. The tumor  
314 images **(H)**, tumor volumes **(I)** and tumor weights **(J)** were shown. Error bars indicate  
315 mean  $\pm$  SD (n = 5 mice/group). \*\*P < 0.01, \*\*\*P < 0.001. Scale bars, 1 cm **(H)**.

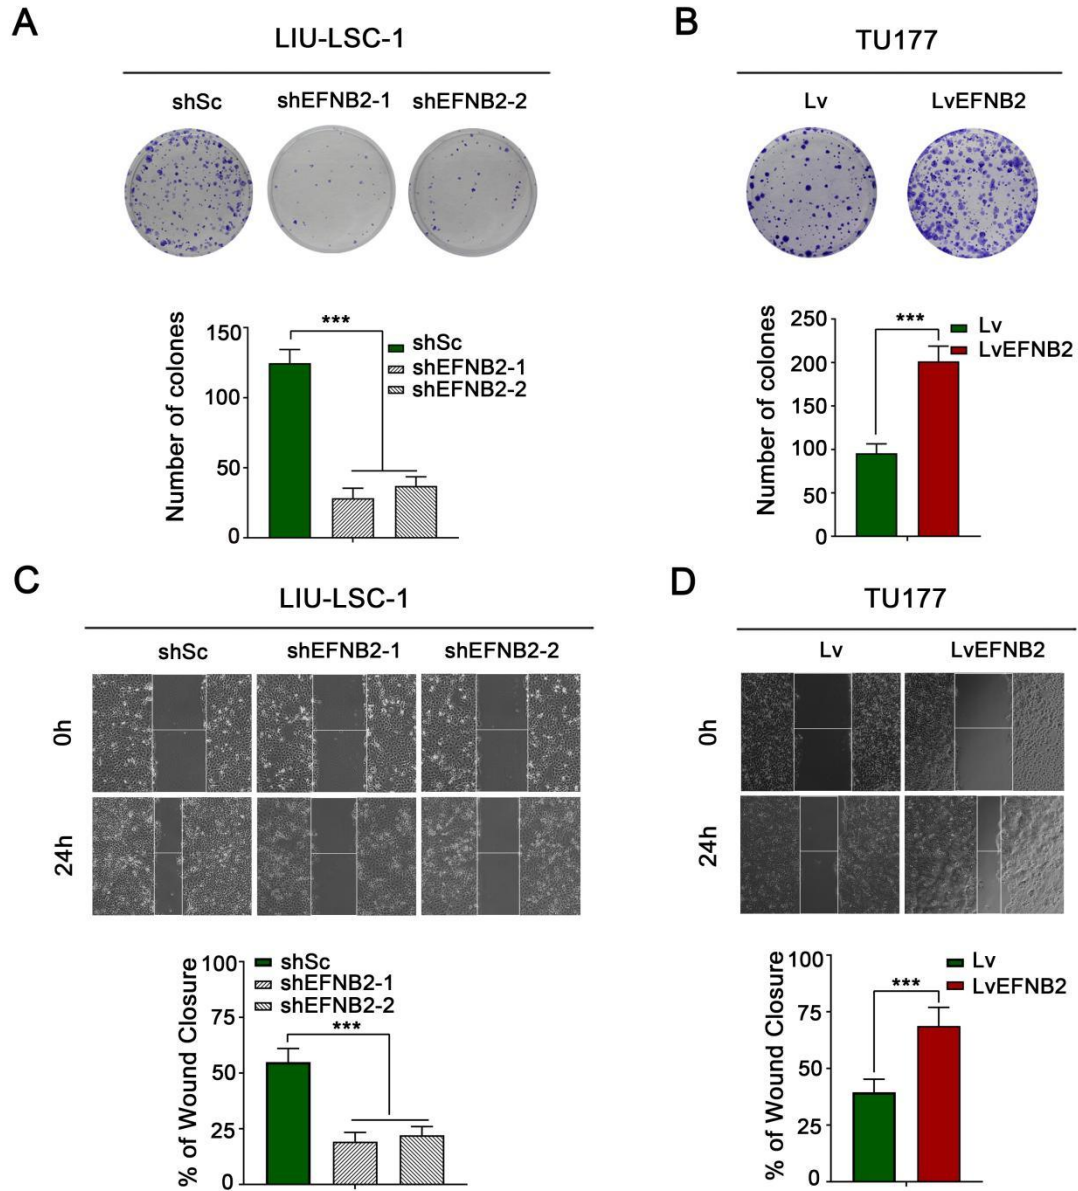

317 **Figure S5. EFNB2 promotes LSCC cells proliferation and migration. (A, C)**  
 318 EFNB2 shRNA-expressing (shEFNB2-1 or shEFNB2-2) LIU-LSC-1 cells and their  
 319 control cells (shSc). **(B, D)** EFNB2-overexpressing (LvEFNB2) TU177 cells and their  
 320 counterpart control cells (Lv). Cell proliferation was determined by colony formation  
 321 assay **(A-B)**. Cell migration was assessed by wound healing assay **(C-D)**. The error  
 322 bars represent the mean  $\pm$  SD of triplicate independent experiments. \*\*\* $P < 0.001$ .

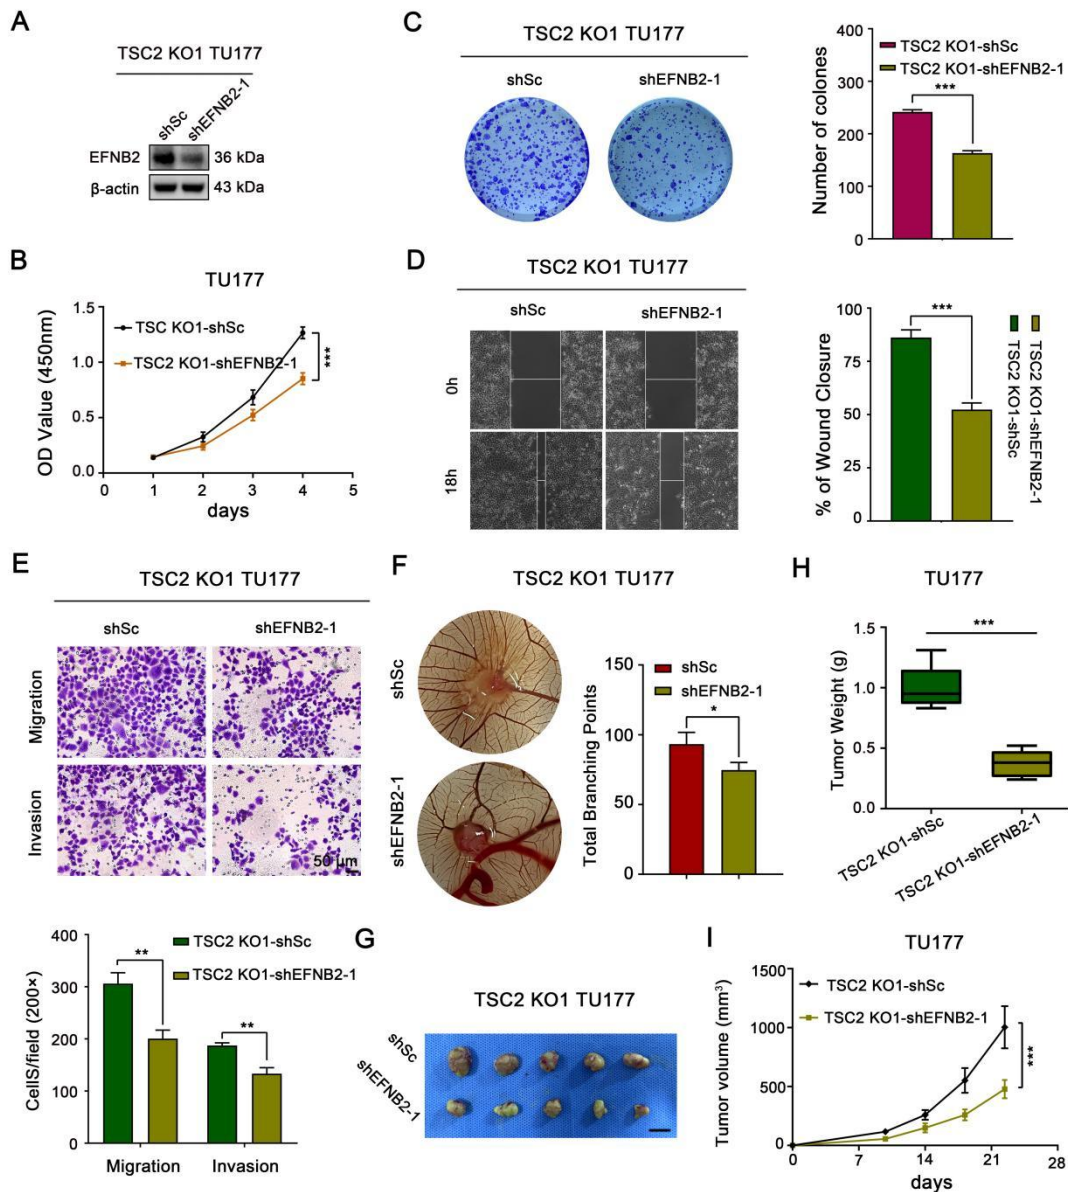

**Figure S6. Silencing of EFNB2 reduced the proliferation, migration, invasion, angiogenesis and tumor growth abilities of the TSC2 KO1 TU177 cells. (A-I) The TSC2 KO1 TU177 cells were infected with EFNB2 shRNAs-expressing (shEFNB2-1) or control shRNA- (shSc) lentiviruses. The EFNB2 expression was assessed using western blotting (A). Cell growth rates, migration and invasion abilities of the indicated cells were evaluated by CCK-8 assays (B), colony formation assays (C, left**

330 **panel:** representative images; **right panel:** statistical analysis), wound healing assays  
331 (**D, left panel:** representative images; **right panel:** statistical analysis) and transwell  
332 assays (**E, upper panel:** representative images; **lower panel:** statistical analysis).  
333 Scale bars, 50  $\mu$ m. Data were indicated as mean  $\pm$  SD of triplicate technical replicates.  
334 **\*\*P < 0.01, \*\*\*P < 0.001.** The indicated cells were subjected to CAM assays (**F, left**  
335 **panel:** representative images; **right panel:** statistical analysis). The error bars  
336 represent mean  $\pm$  SD (n = 6 per group). \*P < 0.05. (**G-I**) The indicated cells were  
337 subcutaneously injected into mice for monitoring tumor growth. The tumor images (**G**)  
338 were recorded. The tumor weights (**H**) and tumor volumes (**I**) were quantified. Error  
339 bars indicate mean  $\pm$  SD (n = 5 mice/group). **\*\*\*P < 0.001.** Scale bars, 1 cm (**G**).

340 **Figure S7**

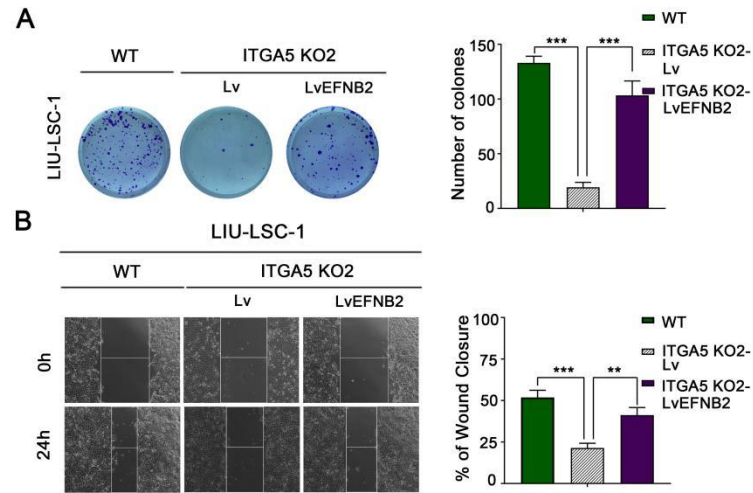

341 **Figure S7. The reduction of proliferation and migration caused by ITGA5**  
 342 **knockout were partly rescued by ectopic expression of EFNB2 in LIU-LSC-1**  
 343 **cells. (A-B)** Proliferative and migratory abilities of EFNB2-overexpressing ITGA5  
 344 KO LIU-LSC1 cells, empty vector-expressing ITGA5 KO LIU-LSC-1 cells and  
 345 ITGA5 WT LIU-LSC-1 cells were measured by colony formation **(A)** and wound  
 346 healing assays **(B)**, respectively. The error bars represent the mean  $\pm$  SD of triplicate  
 347 independent experiments. \*\* $P < 0.01$ ; \*\*\* $P < 0.001$ .

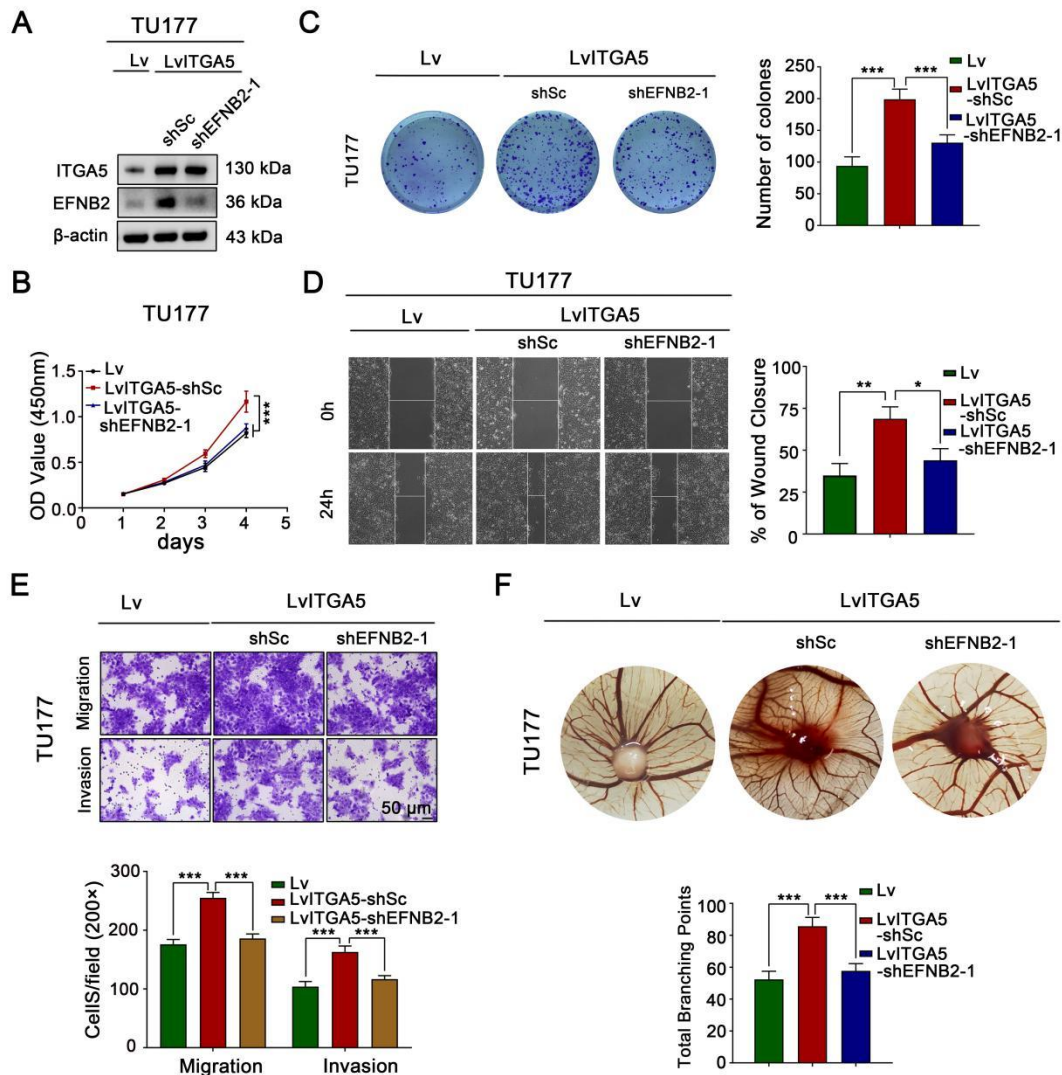

349 **Figure S8. The enhancement of LSCC tumor progression mediated by ITGA5**  
 350 **overexpression was attenuated by knockdown of EFNB2. (A-F) EFNB2 shRNA-**  
 351 **(shEFNB2-1) or control shRNA- (shSc) expressing lentiviruses were transduced to**  
 352 **ITGA5-overexpression TU177 cells and control cells. The protein expression of**  
 353 **ITGA5 and EFNB2 were detected by western blotting (A). The cells were subjected**  
 354 **to CCK-8 (B), colony formation (C), wound healing (D), transwell (E) and the CAM**  
 355 **assays (F). (B-E) The error bars represent the mean  $\pm$  SD of triplicate independent**

356 experiments. \*P < 0.05; \*\*P < 0.01; \*\*\*P < 0.001. Scale Bars, 50  $\mu$ m. **(F)** Error bars  
357 represent mean  $\pm$  SD (n = 6 per group). \*\*P < 0.01; \*\*\*P < 0.001.

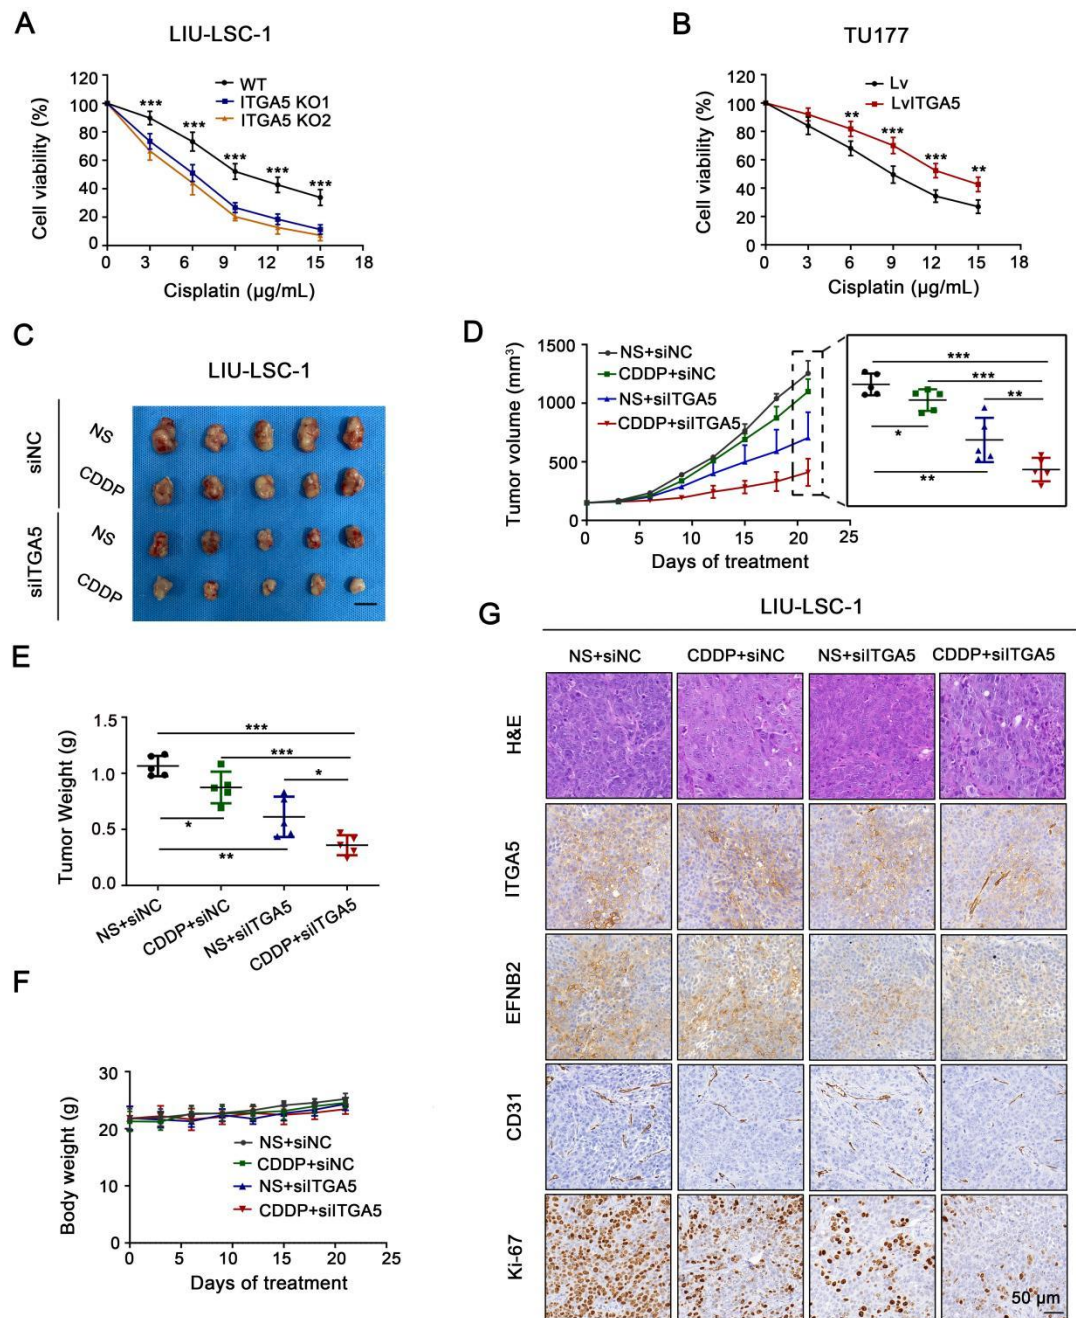

359 **Figure S9. Depletion of ITGA5 increases chemosensitivity of CDDP in LSCC**  
360 **cells. (A-B)** The indicated cells were treated with various concentration of CDDP for  
361 24 h, and cell viability was detected with CCK-8 assay. The error bars represent the  
362 mean  $\pm$  SD of triplicate technical replicates. \*\*\*P < 0.001. **(C-G)** Effects of CDDP  
363 combined with ITGA5 siRNAs on LIU-LSC-1 xenograft tumor growth. Tumor

364 images **(C)**, tumor volume **(D)**, tumor weight **(E)**, and body weight of mice **(F)** were  
365 displayed. Scale bar, 1 cm. Representative IHC images of ITGA5, EFNB2, CD31 and  
366 Ki-67 in subcutaneous xenografts **(G)**. Scale bar, 50  $\mu\text{m}$ . Error bars indicate mean  $\pm$   
367 SD (n = 5 mice/group). \*P < 0.05; \*\*P < 0.01; \*\*\*P < 0.001.

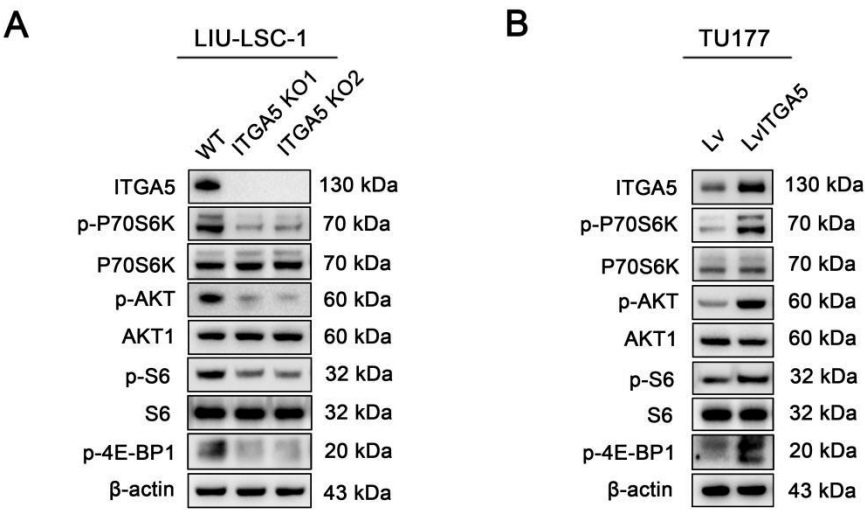

369 **Figure S10. ITGA5 positively regulates the activity of AKT and mTORC1 in**  
370 **LSCC cells. (A-B)** WT and ITGA5 KO LIU-LSC-1 cells **(A)**; ITGA5-overexpressed  
371 TU177 cells (LvITGA5) and control cells (Lv) **(B)**. Cell lysates were subjected to  
372 western blotting with the indicated antibodies **(A-B)**.

373 **Figure S11**

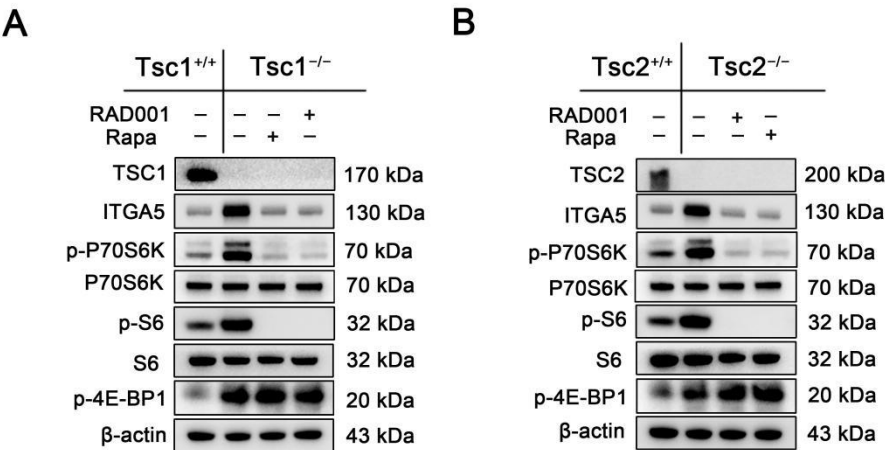

374 **Figure S11. mTORC1 enhances ITGA5 expression in Tsc1<sup>-/-</sup> or Tsc2<sup>-/-</sup> MEFs.**

375 **(A-B)** Tsc1<sup>-/-</sup> **(A)** and Tsc2<sup>-/-</sup> MEFs **(B)** were treated with mTORC1 inhibitors (20  
376 nM Rapa or 50 nM RAD001) for 24 h. Cell lysates were subjected to western blot  
377 analysis.

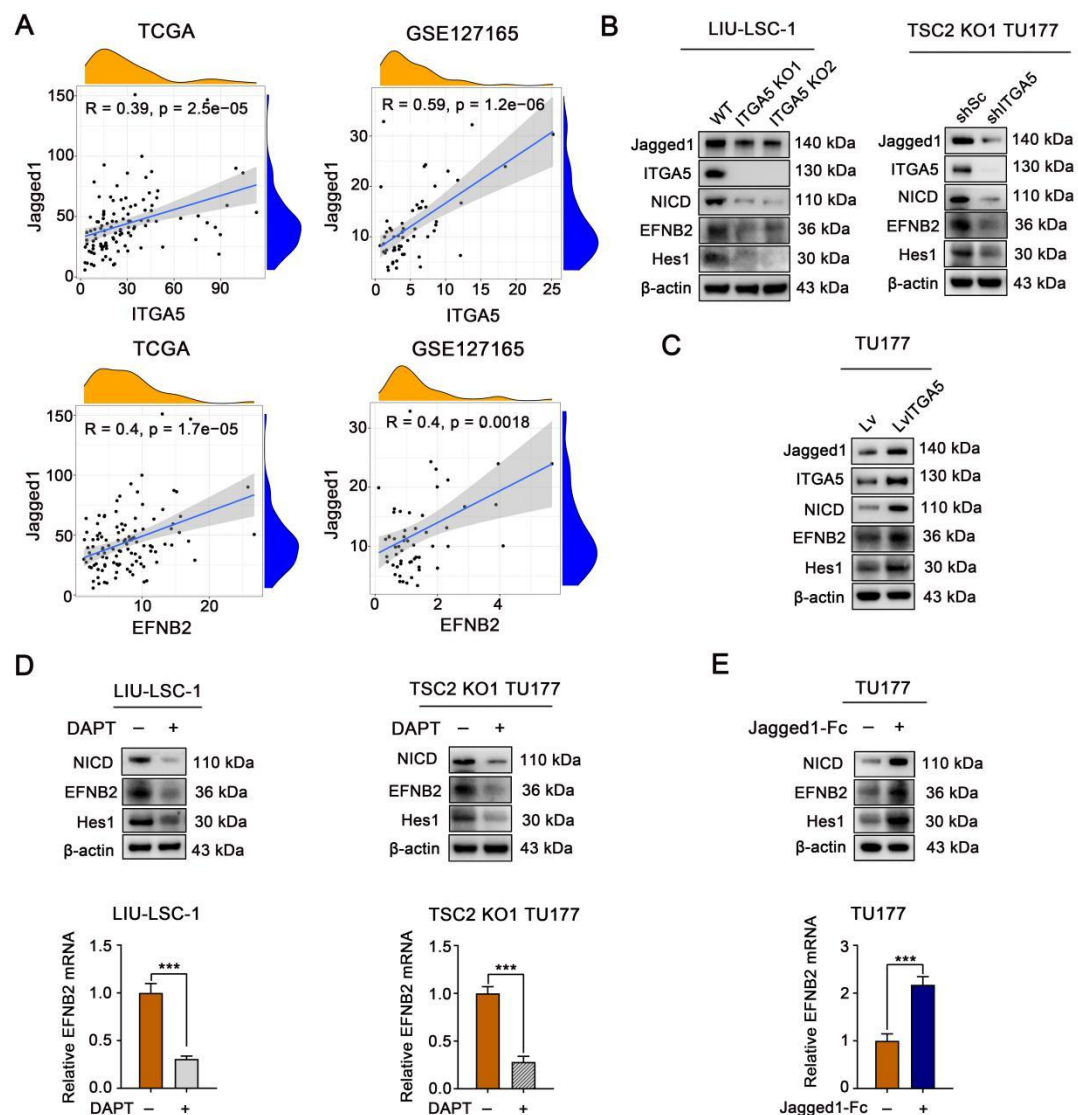

379 **Figure S12. ITGA5 upregulates the expression of EFNB2 through the activation**  
380 **of the Jagged1/Notch1 pathway. (A)** The correlation between Jagged1 and ITGA5  
381 or EFNB2 expression was analyzed by a Pearson's correlation analysis using the  
382 TCGA and GSE127165 cohorts. **(B-C)** Cell lysates of the indicated genetically  
383 engineered LSCC cells were subjected to western blotting with the indicated  
384 antibodies. **(D-E)** The LIU-LSC-1 and TSC2 KO1 TU177 cells were treated with 10  
385  $\mu$ M DAPT for 24 h (D); the TU177 cells were treated with 1 $\mu$ g/mL Jagged1-Fc for 24

386 h (**E**). The samples were subjected to western blotting (**upper panel of D and E**) and  
387 qRT-PCR (**lower panel of D and E**) analyses, respectively. The error bars represent  
388 the mean  $\pm$  SD of triplicate technical replicates. \*\*\*P < 0.001.

390 **Table S1. Clinical features of 94 LSCC patients.**

| Parameters            | Number of Cases (%) |
|-----------------------|---------------------|
| Age                   |                     |
| < 60                  | 34 (36.2)           |
| ≥ 60                  | 60 (63.8)           |
| Gender                |                     |
| Female                | 9 (9.6)             |
| Male                  | 85 (90.4)           |
| T Stage <sup>1</sup>  |                     |
| T1                    | 14 (14.9)           |
| T2                    | 22 (23.4)           |
| T3                    | 27 (28.7)           |
| T4                    | 31 (33.0)           |
| lymph node metastasis |                     |
| N0                    | 61 (64.9)           |
| N+                    | 33 (35.1)           |
| Distant metastasis    |                     |
| M0                    | 91 (96.8)           |
| M1                    | 3 (3.2)             |

<sup>1</sup>TNM Staging is referring to the AJCC 8th edition TNM Staging Criteria.

**Table S2. Correlation between p-S6 expression and clinicopathological characteristics of LSCC patients.**

| Characteristic               | p-S6 expression   |                   | p-value | Method      |
|------------------------------|-------------------|-------------------|---------|-------------|
|                              | High              | Low               |         |             |
| n                            | 47                | 47                |         |             |
| Age, mean $\pm$ SD           | 62.28 $\pm$ 12.04 | 62.21 $\pm$ 10.08 | 0.978   | T test      |
| Gender, n (%)                |                   |                   | 1.000   | Fisher.test |
| Female                       | 5 (5.3%)          | 4 (4.3%)          |         |             |
| Male                         | 42 (44.7%)        | 43 (45.7%)        |         |             |
| T Stage, n (%)               |                   |                   | < 0.001 | Chisq.test  |
| T1                           | 4 (4.3%)          | 10 (10.6%)        |         |             |
| T2                           | 5 (5.3%)          | 17 (18.1%)        |         |             |
| T3                           | 13 (13.8%)        | 14 (14.9%)        |         |             |
| T4                           | 25 (26.6%)        | 6 (6.4%)          |         |             |
| Lymph node metastasis, n (%) |                   |                   | 0.006   | Fisher.test |
| N0                           | 23 (24.5%)        | 38 (40.4%)        |         |             |
| N1                           | 5 (5.3%)          | 3 (3.2%)          |         |             |
| N2                           | 14 (14.9%)        | 3 (3.2%)          |         |             |
| N3                           | 5 (5.3%)          | 3 (3.2%)          |         |             |
| Distant metastasis, n (%)    |                   |                   | 1.000   | Fisher.test |
| M0                           | 46 (48.9%)        | 45 (47.9%)        |         |             |
| M1                           | 1 (1.1%)          | 2 (2.1%)          |         |             |

**Table S3. Correlation between ITGA5 expression and clinicopathological characteristics of LSCC patients.**

| Characteristic               | ITGA5 expression  |               | p-value | Method      |
|------------------------------|-------------------|---------------|---------|-------------|
|                              | High              | Low           |         |             |
| n                            | 47                | 47            |         |             |
| Age, mean $\pm$ SD           | 62.49 $\pm$ 12.18 | 62 $\pm$ 9.91 | 0.831   | T test      |
| Gender, n (%)                |                   |               | 1.000   | Fisher.test |
| Female                       | 4 (4.3%)          | 5 (5.3%)      |         |             |
| Male                         | 43 (45.7%)        | 42 (44.7%)    |         |             |
| T Stage, n (%)               |                   |               | < 0.001 | Chisq.test  |
| T1                           | 4 (4.3%)          | 10 (10.6%)    |         |             |
| T2                           | 4 (4.3%)          | 18 (19.1%)    |         |             |
| T3                           | 12 (12.8%)        | 15 (16%)      |         |             |
| T4                           | 27 (28.7%)        | 4 (4.3%)      |         |             |
| Lymph node metastasis, n (%) |                   |               | < 0.001 | Fisher.test |
| N0                           | 21 (22.3%)        | 40 (42.6%)    |         |             |
| N1                           | 5 (5.3%)          | 3 (3.2%)      |         |             |
| N2                           | 14 (14.9%)        | 3 (3.2%)      |         |             |
| N3                           | 7 (7.4%)          | 1 (1.1%)      |         |             |
| Distant metastasis, n (%)    |                   |               | 1.000   | Fisher.test |
| M0                           | 45 (47.9%)        | 46 (48.9%)    |         |             |
| M1                           | 2 (2.1%)          | 1 (1.1%)      |         |             |

**Table S4. Correlation between EFNB2 expression and clinicopathological characteristics of LSCC patients.**

| Characteristic               | EFNB2 expression  |                   | p       | Method      |
|------------------------------|-------------------|-------------------|---------|-------------|
|                              | High              | Low               |         |             |
| n                            | 47                | 47                |         |             |
| Age, mean $\pm$ SD           | 61.64 $\pm$ 11.01 | 62.85 $\pm$ 11.17 | 0.597   | T test      |
| Gender, n (%)                |                   |                   | 1.000   | Fisher.test |
| Female                       | 5 (5.3%)          | 4 (4.3%)          |         |             |
| Male                         | 42 (44.7%)        | 43 (45.7%)        |         |             |
| T Stage, n (%)               |                   |                   | < 0.001 | Chisq.test  |
| T1                           | 7 (7.4%)          | 7 (7.4%)          |         |             |
| T2                           | 6 (6.4%)          | 16 (17%)          |         |             |
| T3                           | 9 (9.6%)          | 18 (19.1%)        |         |             |
| T4                           | 25 (26.6%)        | 6 (6.4%)          |         |             |
| Lymph node metastasis, n (%) |                   |                   | 0.025   | Fisher.test |
| N0                           | 24 (25.5%)        | 37 (39.4%)        |         |             |
| N1                           | 4 (4.3%)          | 4 (4.3%)          |         |             |
| N2                           | 13 (13.8%)        | 4 (4.3%)          |         |             |
| N3                           | 6 (6.4%)          | 2 (2.1%)          |         |             |
| Distant metastasis, n (%)    |                   |                   | 1.000   | Fisher.test |
| M0                           | 45 (47.9%)        | 46 (48.9%)        |         |             |
| M1                           | 2 (2.1%)          | 1 (1.1%)          |         |             |

397 **Table S5. STR analysis of LIU-LSC-1 cell line.**

| STR alleles | LIU-LSC-1 cell line |         |
|-------------|---------------------|---------|
|             | Allele1             | Allele2 |
| D5S818      | 12                  |         |
| D13S317     | 8                   |         |
| D7S820      | 8                   | 11      |
| D16S539     | 11                  |         |
| VWA         | 16                  |         |
| TH01        | 8                   |         |
| AMEL        | X                   | Y       |
| TPOX        | 8                   | 11      |
| CSF1PO      | 10                  | 12      |
| D12S391     | 15                  | 22      |
| FGA         | 23                  |         |
| D2S1338     | 21                  | 23      |
| D21S11      | 29                  |         |
| D18S51      | 20                  |         |
| D8S1179     | 13                  | 14      |
| D3S1358     | 16                  |         |
| D6S1043     | 11                  | 12      |
| PENTAE      | 16                  | 22      |
| D19S433     | 15.2                | 16.2    |
| PENTAD      | 13                  |         |

398 **Table S6. Cell lines and growth medium.**

| Cell line           | Source                                  | Tissue source                       | Complete growth medium                                                                                                                                                                                                                                         |
|---------------------|-----------------------------------------|-------------------------------------|----------------------------------------------------------------------------------------------------------------------------------------------------------------------------------------------------------------------------------------------------------------|
| TU177               | Otwo Biotech Inc.<br>(Shenzhen, China). | laryngeal SCC                       | RPMI 1640 (Gibco: Cat# 11875093) + 10% FBS<br>(Biological Industries, Cat# 04-001-1ACS) + 1% penicillin/streptomycin (Beyotime, Cat# C0222)<br>Epithelial Cell Complete Medium (VivaCell: Cat# C3660-0100) + 1% penicillin/streptomycin (Beyotime, Cat# C0222) |
| LIU-LSC-1           | newly established cell line             | laryngeal SCC                       | RPMI 1640 (Gibco: Cat# 11875093) + 10% FBS<br>(Biological Industries, Cat# 04-001-1ACS) + 1% penicillin/streptomycin (Beyotime, Cat# C0222)<br>DMEM (Gibco: Cat# 11995065) + 10% FBS                                                                           |
| AMC-HN-8            | Otwo Biotech Inc.<br>(Shenzhen, China). | laryngeal SCC                       | (Biological Industries, Cat# 04-001-1ACS) + 1% penicillin/streptomycin (Beyotime, Cat# C0222)<br>DMEM (Gibco: Cat# 11995065) + 10% FBS                                                                                                                         |
| Tsc1 <sup>+/+</sup> | described previously                    | Murine embryonic fibroblasts (MEFs) | (Biological Industries, Cat# 04-001-1ACS) + 1% penicillin/streptomycin (Beyotime, Cat# C0222)<br>DMEM (Gibco: Cat# 11995065) + 10% FBS                                                                                                                         |
| Tsc1 <sup>-/-</sup> | described previously                    | Murine embryonic fibroblasts (MEFs) | (Biological Industries, Cat# 04-001-1ACS) + 1% penicillin/streptomycin (Beyotime, Cat# C0222)<br>DMEM (Gibco: Cat# 11995065) + 10% FBS                                                                                                                         |
| Tsc2 <sup>+/+</sup> | described previously                    | Murine embryonic fibroblasts (MEFs) | (Biological Industries, Cat# 04-001-1ACS) + 1% penicillin/streptomycin (Beyotime, Cat# C0222)<br>DMEM (Gibco: Cat# 11995065) + 10% FBS                                                                                                                         |
| Tsc2 <sup>-/-</sup> | described previously                    | Murine embryonic fibroblasts (MEFs) | (Biological Industries, Cat# 04-001-1ACS) + 1% penicillin/streptomycin (Beyotime, Cat# C0222)                                                                                                                                                                  |
| HEK293T             | ATCC (Manassas,                         | kidney; Embryo                      | DMEM (Gibco: Cat#                                                                                                                                                                                                                                              |

VA,USA)

11995065) + 10% FBS  
(Biological Industries, Cat#  
04-001-1ACS + 1%  
penicillin/streptomycin  
(Beyotime, Cat# C0222)

---

399 **Table S7. Detailed information of antibodies.**

| ANDIBODYS                                       | SOURCE                    | IDENTIFIER     |
|-------------------------------------------------|---------------------------|----------------|
| Mouse monoclonal antibody anti-Ki-67            | Cell Signaling Technology | Cat# 9027S     |
| Mouse monoclonal antibody anti-beta-Actin       | Sigma-Aldrich             | Cat# A1978     |
| Rabbit monoclonal antibody anti-ITGA5           | Abcam                     | Cat# ab150361  |
| Rabbit monoclonal antibody anti-EFNB2           | Sigma-Aldrich             | Cat# HPA008999 |
| Rabbit monoclonal antibody anti-HIF-1 $\alpha$  | Abcam                     | Cat# ab228649  |
| Rabbit monoclonal antibody anti-p-S6 (S235/236) | Cell Signaling Technology | Cat# 4857S     |
| Rabbit monoclonal antibody anti-S6              | Cell Signaling Technology | Cat# 2217S     |
| Rabbit monoclonal antibody anti-mTOR            | Cell Signaling Technology | Cat# 2983P     |
| Rabbit monoclonal antibody anti-Rictor          | Cell Signaling Technology | Cat# 2114S     |
| Rabbit monoclonal antibody anti-Raptor          | Cell Signaling Technology | Cat# 2280S     |
| Rabbit monoclonal antibody anti-CD31            | Abcam                     | Cat# ab76533   |
| Goat Anti-Rabbit IgG H&L (FITC)                 | Abcam                     | Cat# ab6717    |
| Goat Anti-Mouse IgG HRP                         | Abcam                     | Cat# ab6789    |
| Goat Anti-Rabbit IgG HRP                        | Abcam                     | Cat# ab6721    |
| Mouse monoclonal antibody anti-CD44             | Abcam                     | Cat# ab6124    |
| Rabbit monoclonal antibody anti- Jagged1        | Abcam                     | Cat# ab109536  |
| Rabbit monoclonal antibody anti-p-mTOR(S2448)   | Cell Signaling Technology | Cat# 5536S     |
| Rabbit monoclonal antibody anti-TSC1            | Cell Signaling Technology | Cat# 6935S     |
| Rabbit monoclonal antibody anti-TSC2            | Cell Signaling Technology | Cat# 4308S     |
| Rabbit monoclonal antibody anti-p-AKT(S473)     | Cell Signaling Technology | Cat# 4060S     |

|                                                          |                           |              |
|----------------------------------------------------------|---------------------------|--------------|
| Rabbit monoclonal antibody<br>anti-AKT1                  | Cell Signaling Technology | Cat# 75692S  |
| Rabbit monoclonal antibody<br>anti-NICD                  | Cell Signaling Technology | Cat# 4147S   |
| Rabbit monoclonal antibody<br>anti-p-4E-BP1 (T37/46)     | Cell Signaling Technology | Cat# 2855S   |
| Rabbit monoclonal antibody<br>anti-Hes1                  | Abcam                     | Cat#ab108937 |
| Rabbit polyclonal antibody<br>anti-P70S6K (phospho T389) | Abcam                     | Cat# ab2571  |
| Rabbit monoclonal antibody<br>anti-P70S6K                | Abcam                     | Cat# ab32529 |

---

**Table S8. Primer information for qRT-PCR analysis.**

| Primer name     | GC content (%) | Tm (°C) | Annealing Temperature (°C) | Primer sequence                   |
|-----------------|----------------|---------|----------------------------|-----------------------------------|
| β-actin FORWARD | 52.2           | 58.5    | 60                         | CTG GCA CCA CAC CTT<br>CTA CAA TG |
| β-actin REVERSE | 61.9           | 61.3    |                            | GGC GTA CAG GGA TAG<br>CAC AGC    |
| ITGA5 FORWARD   | 45.5           | 54.6    | 60                         | CAT GAT GAG TTT GGC<br>CGA TTT G  |
| ITGA5 REVERSE   | 45.5           | 54.2    |                            | CCC CCA GGA AAT ACA<br>AAC ACT A  |
| EFNB2 FORWARD   | 40.9           | 53.2    | 60                         | TAA AGA TCC AAC AAG<br>ACG TCC A  |
| EFNB2 REVERSE   | 45.5           | 53.3    |                            | CGT GAT GAT GAT GAC<br>GAT GAA G  |
| RAPTOR FORWARD  | 50.0           | 56.0    | 60                         | GAC ACG GAA GAT GTT<br>CGA CAA G  |
| RAPTOR REVERSE  | 50.0           | 54.7    |                            | ATC TGA GAA GCA ACG<br>CTC TC     |

**Table S9.** Differentially expressed genes of the RNA-seq (shRaptor-1 LIU-LSC-1 cells vs. shSc LIU-LSC-1 cells).

**Table S10.** The top 10 enriched pathways of down-regulated differentially expressed genes in shRaptor-1 LIU-LSC-1 cells compared to the control cells (shSc LIU-LSC-1 cells).

**Table S11.** Differentially expressed genes of the RNA-seq (ITGA5 KO2 LIU-LSC-1 cells vs. WT LIU-LSC-1 cells).
